# Supplementary material
Source: Research Square preprint supplement (doi:10.21203/rs.3.rs-10423656/v1)
Supplement: Supplementary file 1 [file d53ab360f737adc35a3731a6.docx]

**Supplementary material 1. Methodological quality assessment of included studies using the STROBE checklist.**

| Title | Author & Year | Design | STROBE Score (/22) | Quality |
| --- | --- | --- | --- | --- |
| A multicentric study on stigma towards people with mental illness in health sciences students. | Masedo et al., 2021 | Cross-sectional. | 21 | High, multicentric. |
| Actitud de la familia hacia el enfermo mental. | Campo-Revilla et al., 2010 | Cross-sectional. | 18 | Moderate. |
| An exploratory cross-sectional study on Mental health literacy of Spanish adolescents. | González-Sanguino et al., 2024 | Cross-sectional. | 20 | Moderate - High. |
| Analysis of Stigma in Relation to Behaviour and Attitudes towards Mental Health as Influenced by Social Desirability in Nursing Students. | Giralt-Palou et al., 2022 | Longitudinal. | 19 | Moderate - High. |
| Assessment of Public Stigma, Mental Health Literacy, and Help-Seeking Intentions Based on Different Dimensions of Obsessive-Compulsive Content: A Study of the Spanish Mental Health-Naïve Population. | Chaves et al., 2024 | Cross-sectional. | 20 | Moderate - High. |
| Attitudes and Beliefs of Nursing Students Toward Mental Disorder: The Significance of Direct Experience with Patients. | Granados-Gámez et al., 2017 | Cross-sectional. | 18 | Moderate - High. |
| Attitudes and intended behaviour to mental disorders and associated factors in catalan population, Spain: cross-sectional population-based survey. | Aznar-Lou et al., 2016 | Cross-sectional. | 21 | High. |
| Attitudes and opinions of family doctors on depression: Application of the Depression Attitudes Questionnaire (DAQ). | Aragonès et al., 2011 | Cross-sectional. | 18 | Moderate - High. |
| Attitudes of the police towards individuals with a known psychiatric diagnosis. | Mengual-Pujante et al., 2022 | Cross-sectional. | 21 | High. |
| Constructing Illness: How the Public in Eight Western Nations Respond to a Clinical Description of “Schizophrenia”. | Olafsdottir & Pescosolido, 2011 | Cross-sectional. | 21 | High. |
| Descriptive study of stigma associated with severe and persistent mental illness among the general population of Madrid (Spain). | Crespo et al., 2008 | Cross-sectional. | 19 | Moderate - High. |
| Education Students' Stigma Toward Mental Health Problems: A Cross-Cultural Comparison. | Gallego et al., 2020 | Cross-sectional. | 21 | High. |
| Empathy, Burnout, and Attitudes Toward Patients with Mental Disorders Among Mental Health Nurse Residents in Spain: A Cross-Sectional Study. | Román-Sánchez et al., 2025 | Cross-sectional. | 21 | High. |
| Factors associated with the evolution of attitudes towards mental illness in a cohort of nursing students. | O'Ferrall-González et al., 2020 | Longitudinal. | 21 | High. |
| La ansiedad como estigma: el estereotipo de la persona ansiosa en la población clínica, sanitaria y general. | García-Galindo et al., 2012 | Cross-sectional. | 20 | Moderate - High. |
| Mental health professionals’ attitudes towards mental illness: professional and cultural factors in the INTER NOS study. | del Olmo-Romero et al., 2019 | Cross-sectional. | 21 | High. |
| Mental health public stigma at the university. | Saavedra & Murvartian, 2022 | Cross-sectional. | 21 | High. |
| Mental health stigma in spanish university students. | Arnáez et al., 2023 | Cross-sectional. | 21 | High. |
| Mental illness and stigma in young people. A study qualitative Enfermedad mental y estigma en jóvenes. | Vaquero et al., 2014 | Qualitative. | 17 | Moderate. Qualitative studies were assessed with adapted criteria. |
| Perception of emotional unpredictability of persons with severe mental disorders in the general population of Badajoz city. | Mogollón-Rodríguez et al., 2014 | Descriptive. | 20 | Moderate - High. |
| Perceptions about mental illness among general practitioners. | Castillejos et al., 2019 | Cross-sectional. | 20 | Moderate - High. |
| Public stigma profile toward mental disorders across different university degrees in the University of Valencia (Spain). | Ruiz et al., 2022 | Cross-sectional. | 18 | Moderate - High. |
| Snapshot of knowledge and stigma toward mental health disorders and treatment in Spain. | Varaona et al., 2024 | Cross-sectional. | 19 | Moderate - High. |
| Spanish medical students' attitudes and views towards mental health and psychiatry: A multicentric cross-sectional study. | Failde et al., 2014 | Cross-sectional. | 21 | High. |
| Opinions and beliefs of the Spanish population on serious mental illnesses (schizophrenia and bipolar disorder). | Ruiz et al., 2012 | Cross-sectional. | 20 | Moderate - High. |
| Stigma toward individuals with intellectual disabilities and severe mental disorders: analysis of postgraduate university students’ perceptions. | Moraleda & Galán-Casado, 2024 | Cross-sectional. | 21 | High. |
| Stigma Toward Severe Mental Illness Among Healthcare Students: A Qualitative Study. | Masedo & Martínez, 2025 | Qualitative. | 16 | Moderate. Qualitative studies were assessed with adapted criteria. |
| Stigmatizing Attitudes towards Mental Illness among University Students: A Comparative Study with the General Population. | Atienza-Carbonell et al., 2024 | Cross-sectional. | 21 | High. |
| Study of the relationship between implicit and explicit stigmas associated with mental illness. | González-Sanguino et al., 2019 | Cross-sectional. | 21 | High. |
| The attitudes of mental health professionals on the employability of people with mental illness: A different view limiting employment rehabilitation. | Lettieri et al., 2022 | Cross-sectional. | 21 | High. |
| The importance of training and previous contact in university students' opinion about persons with mental disorder. | Barroso-Hurtado & Mendo-Lázaro, 2018 | Cross-sectional. | 21 | High. |
| The public perception of depression in Spain. | Lahera et al., 2019 | Cross-sectional. | 20 | Moderate - High. |
| The Spanish version of the Psychiatric/Mental health clinical placement survey and an assessment of Spanish student attitudes towards mental health. | Juliá-Sanchis et al., 2020 | Cross-sectional. | 21 | High. |
| The stigma of mental health problems: A cross-sectional study in a representative sample of Spain. | González- Sanguino et al., 2023 | Cross-sectional. | 19 | Moderate - High. |
| The stigma of mental health professionals towards users with a mental disorder. | Valverde-Bolivar et al., 2022 | Cross-sectional. | 19 | Moderate - High. |
| What do Spanish adolescents think about obsessive-compulsive disorder? Mental health literacy and stigma associated with symmetry/order and aggression-related symptoms. | García-Soriano & Roncero, 2017 | Cross-sectional. | 18 | Moderate - High. |
