# Supplementary material
Source: Research Square preprint supplement (doi:10.21203/rs.3.rs-10423656/v1)
Supplement: Supplementary file 2 [file f7d6719dd6a9dde6d25c5cc8.docx]

**Supplementary material 1**

**Search Equation**

*Europe PMC*

("mental disorder*" OR "mental illness*" OR "psychiatric disorder*") AND ("stigma" OR "stigmatization" OR "stereotype*" OR "prejudice" OR "social discrimination") AND ("Spain" OR "Spanish") AND ("sociodemographic" OR "gender" OR "sex" OR "age" OR "education" OR "educational level" OR "contact" OR "direct contact") AND (PUB_YEAR:[2000 TO 2025])

*Scopus*

TITLE-ABS-KEY ( "mental disorder*" OR "mental illness*" ) AND TITLE-ABS-KEY ( stigma* OR stigmatization OR stereotype* OR prejudice OR "social discrimination" ) AND TITLE-ABS-KEY ( Spain OR Spanish )

*PsycInfo*

(DE "Mental Disorders" OR TI("mental illness*" OR "psychiatric disorder*") OR AB("mental illness*" OR "psychiatric disorder*")) AND (DE "Social Stigma" OR TI(stigma* OR stereotyp* OR prejudice OR "social discrimination") OR AB(stigma* OR stereotyp* OR prejudice OR "social discrimination"))

*PubMed*

("Mental Disorders"[Mesh] OR "Mental Illness"[tiab] OR "Psychiatric Disorders"[tiab]) AND ("Social Stigma"[Mesh] OR stigma[tiab] OR stigmatization[tiab] OR stereotypes[tiab] OR prejudice[tiab] OR "social discrimination"[tiab]) AND ("Spain"[Mesh] OR spain*[tiab] OR spanish[tiab]) AND ("Sociodemographic Factors"[Mesh] OR sex[tiab] OR gender[tiab] OR age[tiab] OR "educational level"[tiab] OR education[tiab] OR contact[tiab]) AND ("2000/01/01"[dp] : "2025/12/31"[dp])
